# Supplementary material for: Genomics-Driven Precision Medicine for Advanced Pancreatic Cancer: Early Results from the COMPASS Trial
Source: Oxford University Press journal article supplement (doi:10.1158/1078-0432.ccr-17-2994), 2017-12-29
Supplement: 10780432ccr172994-sup-190607_2_supp_4444191_p0tktm.docx [file 10780432ccr172994-sup-190607_2_supp_4444191_p0tktm.docx]

### Online Supplementary Materials

**Methods**

**Laser Capture Microdissection**

Sections cut from frozen biopsy cores were loaded on PEN-Membrane slides [Leica Microsystems, No. 11505158 for DNA extraction or No. 11505189 for RNA. MicroDissect GmbH. Panoramablick 31. D-35745 Herborn, (Germany)]. The slides were lightly stained by Harris-hematoxylin (1:3). Laser Capture Microdissection (LCM) was performed with Leica LMD7000 [Leica Microsystems CMS GmbH. Ernst-Leitz-Straße 17-37. D-35578 Wetzlar (Germany)]. Tissue was collected in 0.5 ml Eppendorf tubes and stored in DNA or RNA extraction buffer at -80°C until extraction.

**Whole Genome Sequencing**

*Sample and Library Preparation*

Cells obtained from LCM were lysed in 120 µl 1:1000 Cell Lysis (Qiagen, Hilden, Germany, Cat# 158908):RNase A (Sigma-Aldrich, St. Louis, MO, USA, Cat# R4642) solution and incubated at room temperature for 30 min. Five microliters of Proteinase K (New England Biolabs, Ipswich, MA, USA, Cat# P8107S) and 1µl 2M CaCl2 (Fisher Scientific, Waltham, MA, USA Cat#SC10-1) were added to each sample, followed by an overnight incubation at 55˚C. Proteins were precipitated by mixing samples with 40µl of Protein Precipitation solution (Qiagen, Hilden, Germany, Cat#158912) and centrifugation for 3 min at 21130 relative centrifugal force (RCF). The supernatant was combined and mixed with 0.8X volume of isopropanol and 1µl of Glycoblue (Life Technologies, Carlsbad, CA, USA, Cat# AM9515) to precipitate the DNA. Samples were snap frozen at -80˚C for 20 min, thawed and centrifuged for 3 min at 21130 RCF. The supernatant was discarded, pellet washed with 70% EtOH, centrifuged for 3 min at 21130 RCF. The supernatant was discarded. DNA was resuspended in Tris-EDTA 1X (Fisher Scientific, Waltham, MA, USA, Cat#BP2474-100), and quantified using Qubit (Life Technologies, Carlsbad, CA, Cat #Q32854).

Fifty nanograms of Qubit (Life Technologies, Carlsbad, CA, Cat #Q32854) quantified gDNA was sheared to 300-500bp fragments using the Covaris S2 Ultra-sonicator (Covaris Inc., Woburn, MA, USA). Libraries were constructed using enzymatic reagents from KAPA Hyper Prep Library Preparation Kits (KAPA Biosystems, Woburn, MA USA Cat#KK8505) according to protocols described by Fisher et al.(1) for end repair, A-tailing, and adapter ligation. Adapter-ligated libraries were enriched using optimized PCR conditions by adding 2.5uL of NextFlex adaptor- and Illumina-compatible paired-end enrichment primers (12.5uM) (Integrated DNA Technologies, Coralville, Iowa, USA), 25μL of 2x KAPA HiFi HotStart ReadyMix (KAPA Biosystems, Woburn, MA, USA Cat#KK2602). Libraries were incubated in Verti 96-well Thermal Cyclers (Life Technologies, Carlsbad, CA, USA) for 45s at 98°C and cycled 7 times for 15s at 98°C, 30s at 60°C, and 30s at 72°C. Following a 0.8x SPRI bead clean-up, post-PCR enriched libraries were eluted in 20uL of 1X Low TE and validated using Agilent High Sensitivity D1000 ScreenTape and Reagents on the 2200 TapeStation System (Agilent Technologies, Santa Clara, CA, USA Cat#5067-5584 and 5067-5585).

*Sequencing*

Libraries were quantified on the Viia7 Real-Time PCR System (ThermoFisher Scientific, Waltham, MA, USA) using KAPA Complete (ROX low) Library Quantification Kits (KAPA Biosciences, Woburn, MA, USA Cat#KK 4873) according to the manufacturer’s standard protocol. Paired-end cluster generation and sequencing was carried out for all libraries on the Illumina HiSeq 2500 platform using high-output mode 2X126 cycles (Illumina Inc., San Diego, CA, USA Cat #PE-401-4001/FC-401-4001). Samples were sequenced with the number of lanes predicted to yield a collapsed coverage of 50X and 35X for tumour and normal samples, respectively.

*Analysis*

BWA sampe (v0.6.2) was used to align reads to the hg19 human reference. PCR duplicates were flagged with Picard (v1.90). Coverage and other sequencing and sample identity metrics (described below) were calculated using samtools (v0.1.19) and custom scripts.

Somatic SNVs were identified using two tools – Strelka (v1.0.7) and MuTect (v1.1.4) – and, in order to increase precision, only variants called by both tools were retained. Somatic indels were identified by Strelka. Performance of this pipeline is fully described by Denroche et al. 2015(2). Variants were annotated for gene consequence and population frequency using ANNOVAR (2013-06-21 build).

Germline SNPs and indels were called with the Genome Analysis Tool Kit (GATK, v1.3.16). Reads were locally realigned, base qualities were recalibrated, and variants were filtered according to best practices. Variants were annotated for gene consequence and population frequency using ANNOVAR (2013-06-21 build).

CREST (vAlpha) and DELLY (v0.5.5) were employed to detect somatic structural variants. The output of each tool was filtered using in-house defined thresholds and the results merged to create the final list of variants. Structural variant calls were annotated with RefSeq genes.

Tumour cellularity, ploidy, and somatic copy number variants were determined using CELLULOID v0.11.2 (<https://github.com/mathieu-lemire/celluloid_0.11>), which uses read counts from HMMcopy (v0.1.1) and germline heterozygous SNVs from GATK to fit cellularity and clonality models to copy number segments. Solutions were reviewed manually.

Neoantigens were called using NetMHC (pan-2.8) to predict the binding affinity between somatic peptides and the patient’s HLA types. Somatic peptides were generated by creating all possible 9-mers at sites of somatic SNVs or indels with a custom script. HLA types were called by POLYSOLVER (v1.0).

Results and metadata were automatically collected into an html based Genome Summary Report for each patient using perl for logic and R for graphics.

## RNA Sequencing

*Sample and Library Preparation*

RNA was isolated from LCM material using the PicoPure RNA Isolation Kit (Thermo Fisher, Waltham, MA), which includes steps for DNase treatment. Following isolation, RNA was quantified using Qubit dsRNA High Sensitivity kit (Invitrogen, Eugene, Oregon). Quality and integrity was measured using RNA Screen Tape Assay (Agilent, Santa Clara, CA) in combination with the 2200 TapeStation System. RNA Libraries were prepared using the TruSeq RNA Access Library Sample prep kit (Illumina Inc., San Diego, CA, Cat#RS-301-2001) and standard manufacturer’s protocols. In brief, first cDNA was synthesized with an input of 20-40ng of total RNA (DV200>30%). SuperScript II reverse transcriptase (Invitrogen, Carlsbad, CA) was used in first- and second-strand synthesis. Resulting cDNA underwent A-tailing, adapter-ligation, and amplification using 15 cycles of PCR. cDNA libraries were run on the TapeStation with the High Sensitivity d1000 ScreenTape Reagents on the 2200 TapeStation System (Agilent Technologies, Santa Clara, CA, USA Cat#5067-5584 and 5067-5585) to verify an insert distribution averaging around ~280bp. cDNA libraries (200 ng each) were pooled (n=4) and underwent two consecutive hybridizations and captures. The pool was then amplified using 10 cycles of PCR. The final pool was validated on the TapeStation with the High Sensitivity D1000 ScreenTape Assay (Agilent).

*Sequencing*

Library pools were quantified on the Viia7 Real-Time PCR System (ThermoFisher Scientific, Waltham, MA, USA) using KAPA Complete (ROX low) Library Quantification Kits (KAPA Biosciences, Woburn, MA, USA Cat#KK 4873) according to the manufacturer’s protocols. Paired-end cluster generation (Illumina) and sequencing of 2 x 126 cycles (Illumina) was carried out for all libraries on the Illumina HiSeq 2500 platform.

*Analysis*

Reads were aligned to the human reference genome (hg38) and transcriptome (Ensembl v84) using STAR v.2.5.2a.(3) Picard v. 1.121 (<https://github.com/broadinstitute/picard>) was used for marking duplicated reads. Gene expression was calculated in fragments per kilobase of exon per million reads mapped (FPKM) using commands in cufflinks package v. 2.2.1.(4) In differential gene expression, normalized gene expression was rescaled against 6 normal pancreatic tissue samples, from resected pancreas, that were not part of the COMPASS cohort.

RNA subtypes were called based on gene expression levels of three gene sets described in Collisson et al.,(5) Moffitt et al.,(6) and Bailey et al.(7) Gene expression obtained from cufflinks was analyzed in terms of log2(1 + FPKM). For each of the subtypes considered (Collisson et al., Moffitt et al., and Bailey et al.) consensus clustering was performed based on correlation distance of signature genes. Genes were matched by symbol from their original publication, resulting in, from Collisson et al.: 22 classical, 20 exocrine-like, and 20 quasi-mesenchymal genes, from Moffitt et al.: 23 basal-like, and 23 classical genes, from Bailey et al.: 455 differentially expressed genes, of which 53 were ADEX specific, 54 were immunogenic specific, 64 were pancreatic progenitor specific, and 72 were squamous subtype specific. Dendrograms were then cut and branches labelled semiautomatically to assign subtypes to samples consistent with their respective expression patterns. These cluster-based subtype assignments were performed blinded with respect to all sample characteristics or clinical data other than organ site.

**Supplementary Table 1:** Summary of whole genome sequencing results including performance metrics and time to reporting (N=62).

**Supplementary Table 2:** Summary of GATA6 RNA in situ results and its correlation with RNA subtype and histologic grade.

**Supplementary Figure 1:** WGS Performance Characteristics. Four bar plots show the results of the 62 samples sequenced and reported. The dashed lines indicate quality control cutoffs for tumour coverage (>45X), normal coverage (>30X), tumour cellularity (>20%) and days to report (<56 days). Every sample met all four targets with one exception: COMP-0027 only reached 42X coverage. Additional sequencing could have been performed, but given the high cellularity of the sample (93%) it was deemed to be unnecessary.


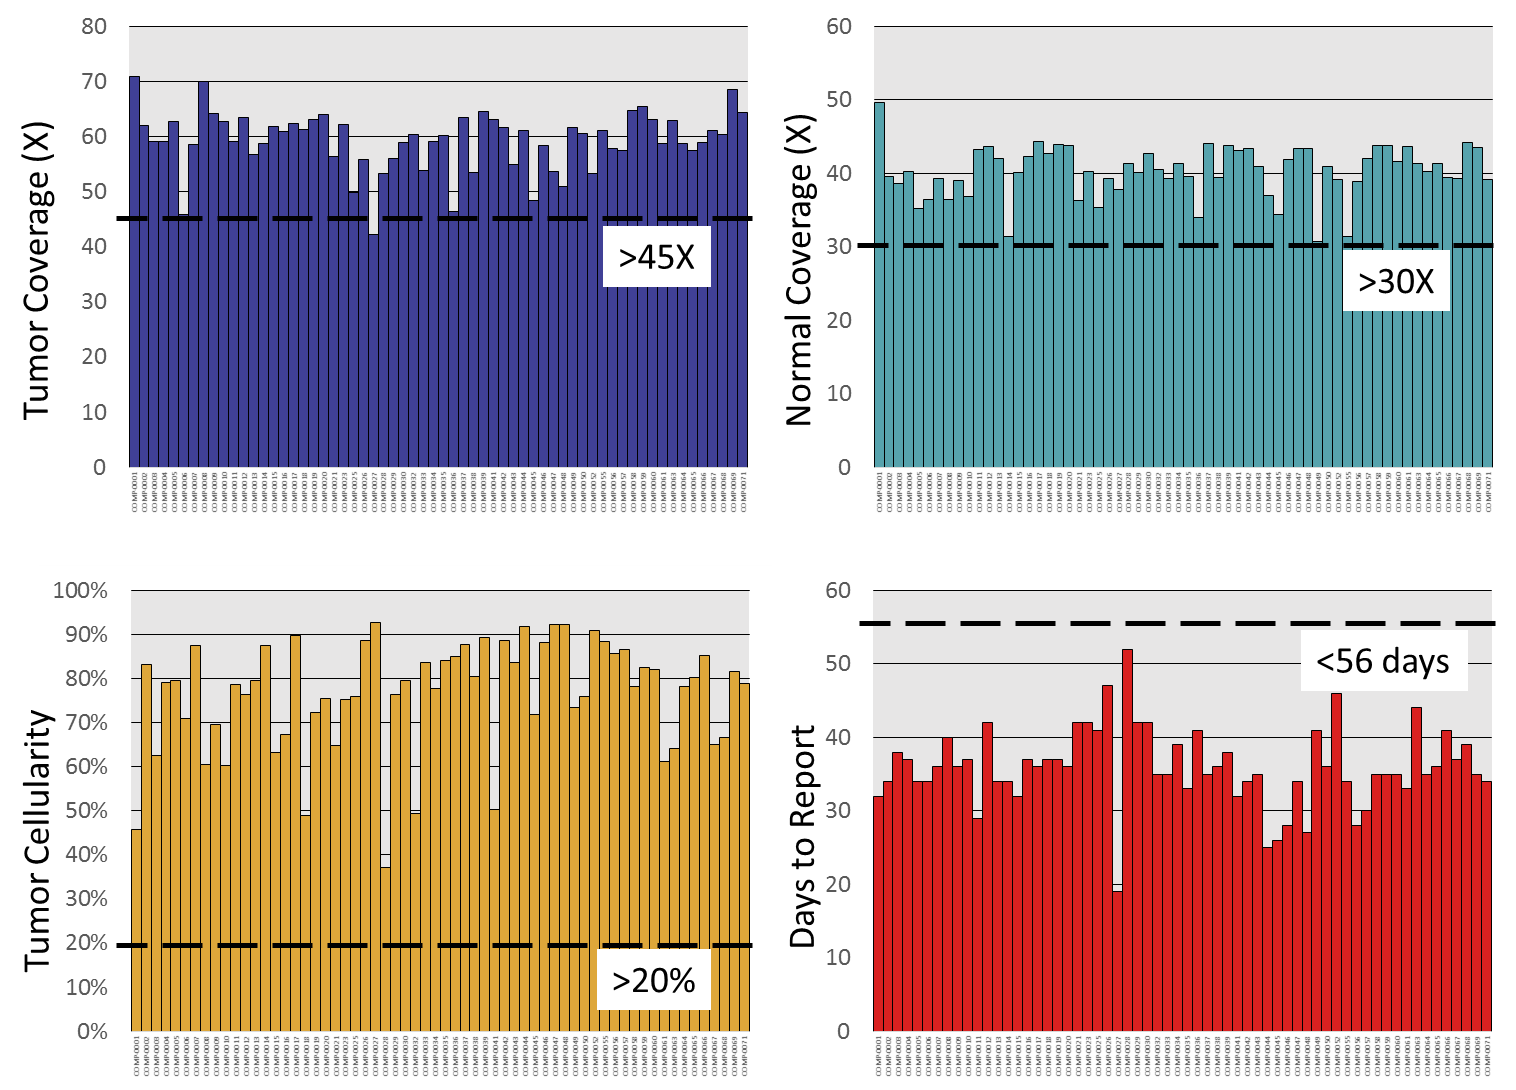


**Supplementary Figure 2:** Both COMP-0037 and COMP-0057 had germline *BRCA2* p.S1982fs mutations but only COMP-0037 had a second hit (somatic LOH of wild type allele) and showed hallmarks of double strand break repair deficiency.


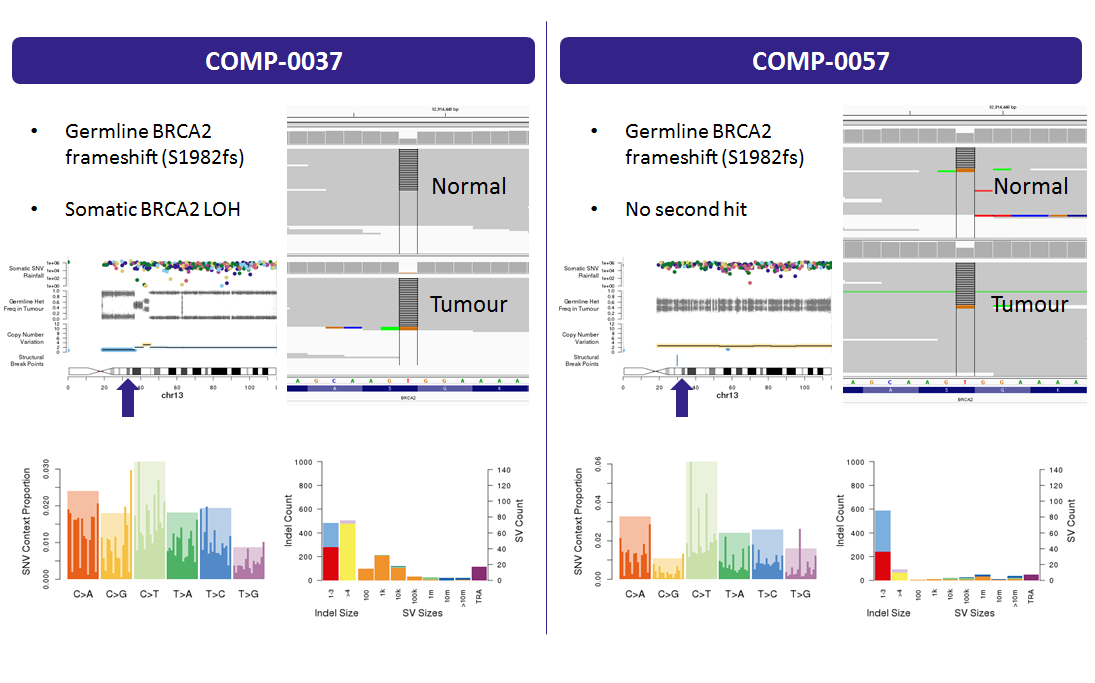


**Supplementary Figure 3: *BRCA2* mutation status of COMP-0057.** The patient had germline pathogenic *BRCA2* frameshift mutation (p.S1982fs, rs80359550). Genomic analysis of liver metastases from pancreatic cancer in 2017 did not reveal LOH or other somatic mutation in *BRCA2* but targeted sequencing of patient’s two previous breast cancers diagnosed in 2004 and 2009 revealed *BRCA2* LOH. Abbreviation: LOH, loss of heterozygosity.


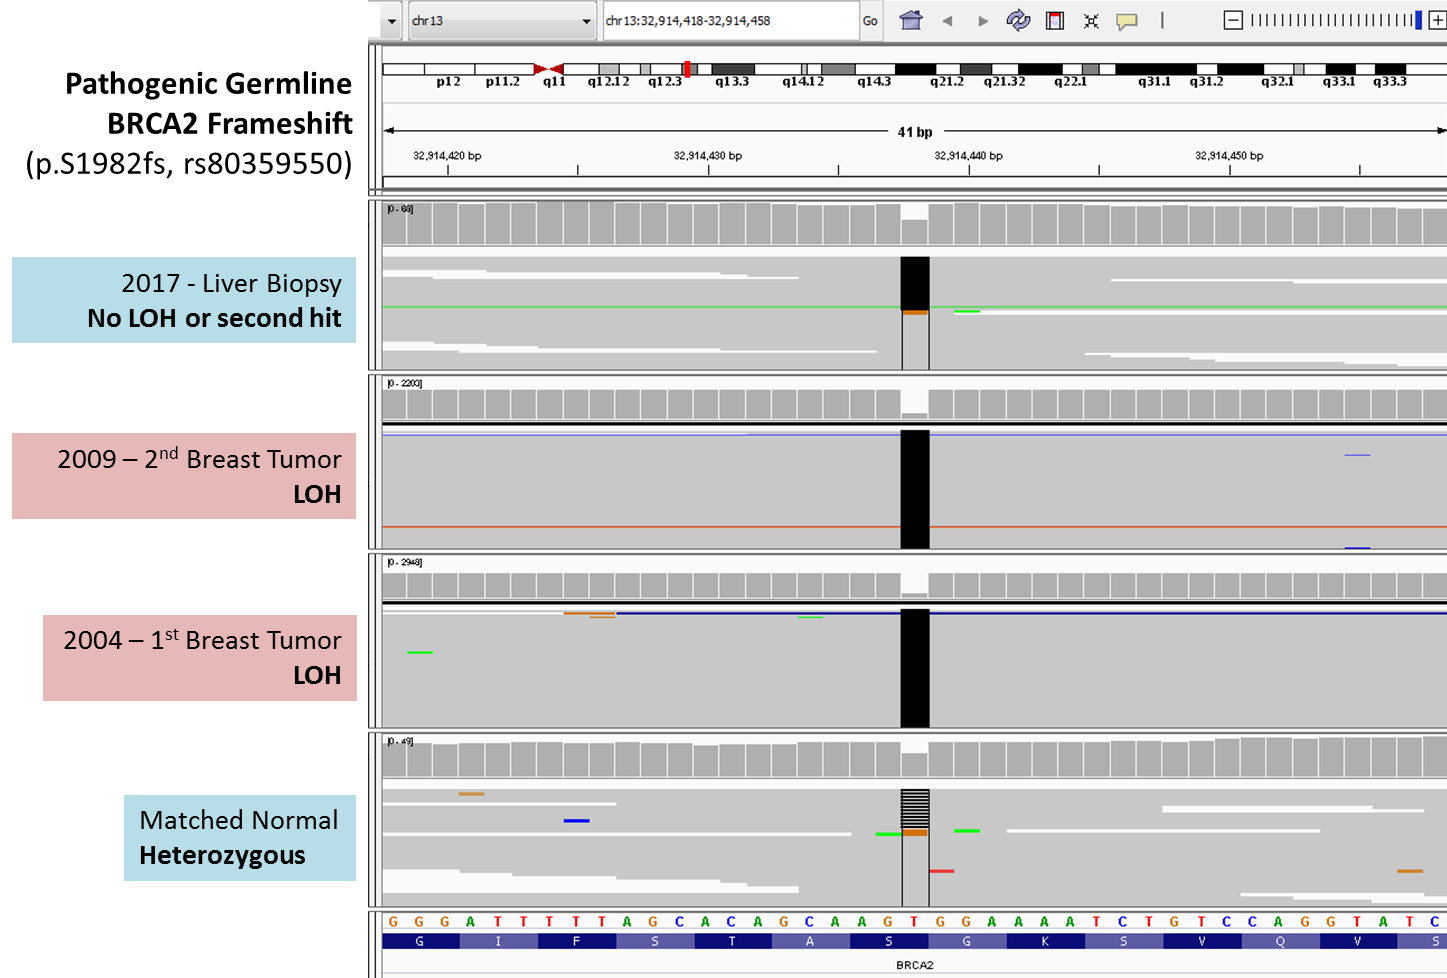


**Supplementary Figure 4:** Subtypes of advanced PDAC by Moffitt tumour classification

Metastatic

Locally advanced

**Supplementary Figure 5:** Correlation between Moffitt tumor RNA subtypes and *GATA6* gene expression.


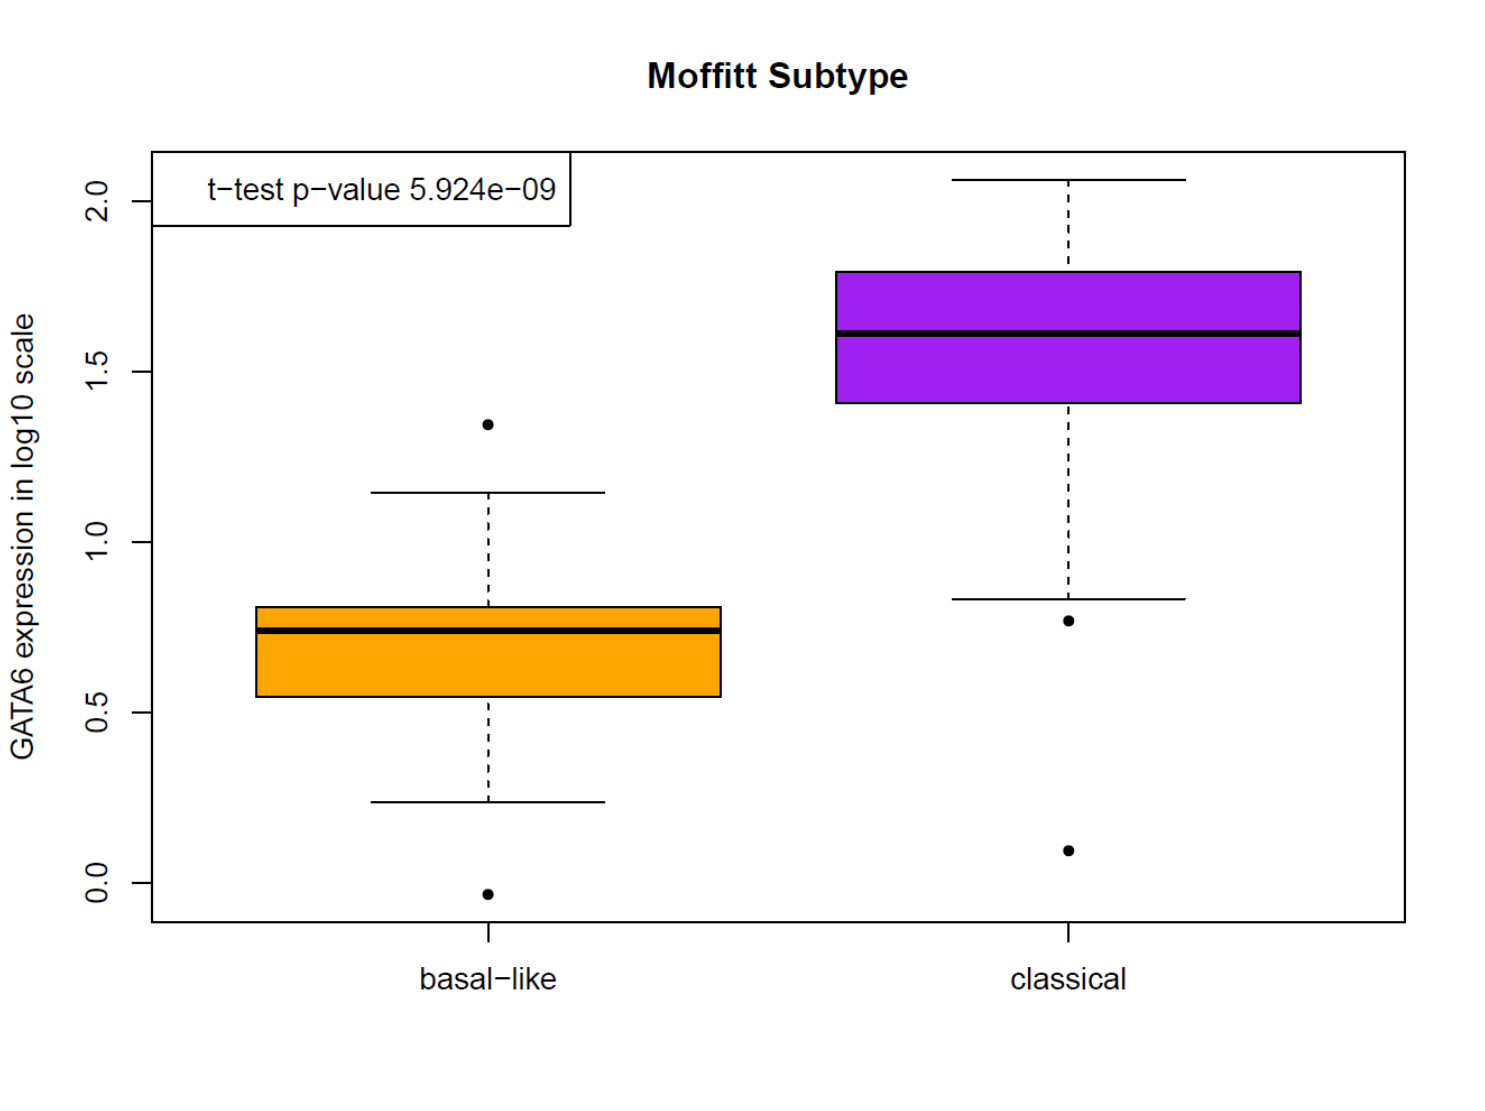


**Supplementary Figure 6:** Correlation between GATA6 expression measured by RNASeq and RNA in situ hybridization.

**Supplementary Figure 7:** Differentially expressed pathways between Moffitt’s basal like and classical RNA subtypes. **A)** In the basal-like subtype, hypoxia and metastasis pathways are upregulated while TGF beta receptor signaling and luminal vs. basal pathways are downregulated. **B)** In the classical subtype, HNF4A (hepatocyte nuclear factor 4alpha) targets, luminal vs. basal, and sensitivity to cisplatin pathways are upregulated. Abbreviations: UP, upregulated; DN, downregulated.

A.

B.

**Supplementary Figure 8:** *CDK4* amplification identified in COMP-0008 (A) and *CDK6* amplification identified in COMP-0010 (B) validated by fluorescence in-situ hybridization.

**A.**

**
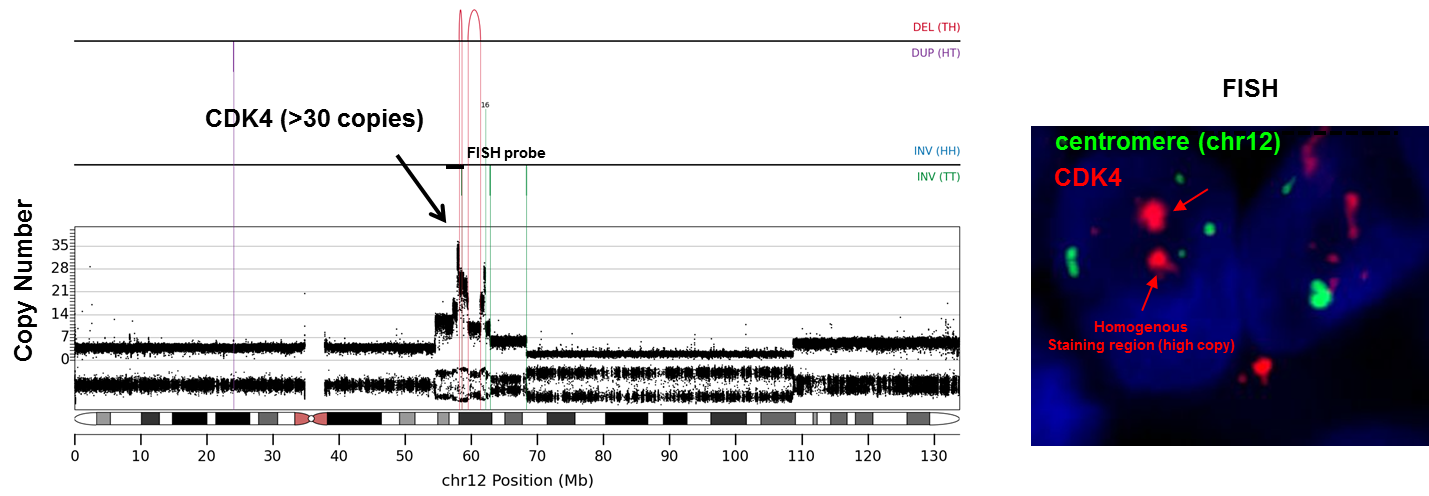
**

**B.**

**
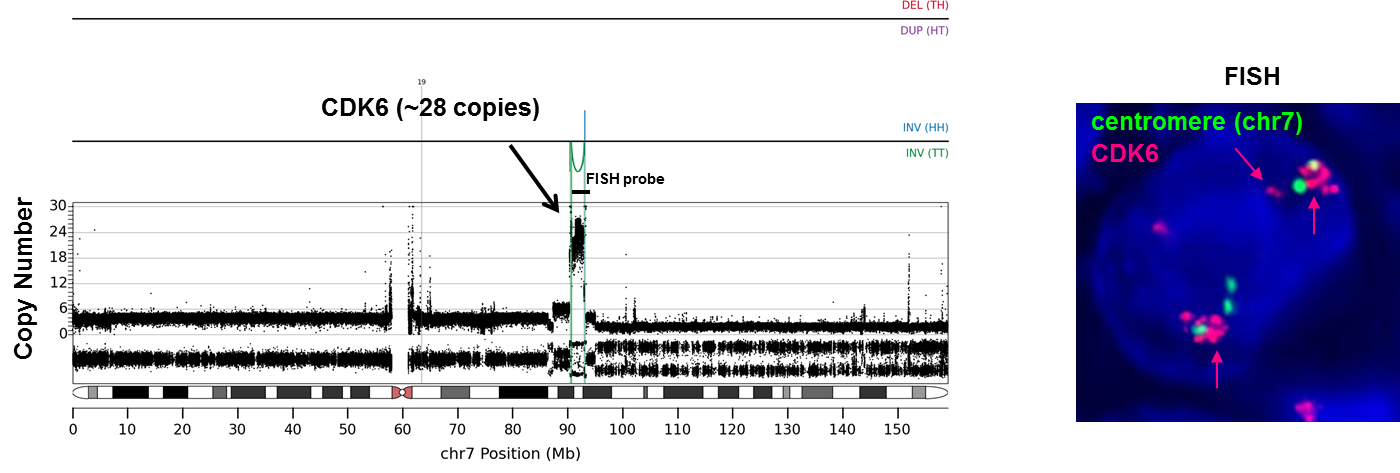
**

### References

1. Fisher S, Barry A, Abreu J, Minie B, Nolan J, Delorey TM, et al. A scalable, fully automated process for construction of sequence-ready human exome targeted capture libraries. Genome Biol. 2011;12(1):R1.

2. Denroche RE, Mullen L, Timms L, Beck T, Yung CK, Stein L, et al. A cancer cell-line titration series for evaluating somatic classification. BMC Res Notes. 2015;8:823.

3. Dobin A, Davis CA, Schlesinger F, Drenkow J, Zaleski C, Jha S, et al. STAR: ultrafast universal RNA-seq aligner. Bioinformatics. 2013;29(1):15-21.

4. Trapnell C, Williams BA, Pertea G, Mortazavi A, Kwan G, van Baren MJ, et al. Transcript assembly and quantification by RNA-Seq reveals unannotated transcripts and isoform switching during cell differentiation. Nat Biotechnol. 2010;28(5):511-5.

5. Collisson EA, Sadanandam A, Olson P, Gibb WJ, Truitt M, Gu S, et al. Subtypes of pancreatic ductal adenocarcinoma and their differing responses to therapy. Nat Med. 2011;17(4):500-3.

6. Moffitt RA, Marayati R, Flate EL, Volmar KE, Loeza SG, Hoadley KA, et al. Virtual microdissection identifies distinct tumor- and stroma-specific subtypes of pancreatic ductal adenocarcinoma. Nat Genet. 2015;47(10):1168-78.

7. Bailey P, Chang DK, Nones K, Johns AL, Patch AM, Gingras MC, et al. Genomic analyses identify molecular subtypes of pancreatic cancer. Nature. 2016;531(7592):47-52.
